## **A toolkit for tissue-specific protein degradation in *C. elegans***

Running title: GFP-mediated protein degradation

Shaohe Wang<sup>1,2</sup>, Ngang Heok Tang<sup>3</sup>, Pablo Lara-Gonzalez<sup>1</sup>, Bram Prevo<sup>1</sup>, Dhanya K. Cheerambathur<sup>1</sup>, Andrew D. Chisholm<sup>3</sup>, Arshad Desai<sup>1</sup> and Karen Oegema<sup>1,@</sup>

<sup>1</sup>Ludwig Institute for Cancer Research, Department of Cellular and Molecular Medicine, University of California San Diego, La Jolla, California 92093, USA

<sup>2</sup>Present address: Cell Biology Section, National Institute of Dental and Craniofacial Research, National Institutes of Health, Bethesda, Maryland 20892, USA

<sup>3</sup>Section of Neurobiology, Division of Biological Sciences, University of California San Diego, La Jolla, California 92093, USA

@Corresponding author

Email: koegema@ucsd.edu, Phone:(858) 534-9576

Key Words: protein degradation, *C. elegans*, ZIF-1, GFP nanobody, vhhGFP4

Summary statement: An easy-to-implement protein degradation method that targets GFP fusions eliminates proteins in specific *C. elegans* tissues.

Total word count: 2907

## ABSTRACT

Proteins essential for embryo production, cell division, and early embryonic events are frequently re-utilized later in embryogenesis, during organismal development, or in the adult. Examining protein function across these different biological contexts requires tissue-specific perturbation. Here, we describe a method that utilizes expression of a fusion between a GFP-targeting nanobody and SOCS-box containing ubiquitin ligase adaptor to target GFP tagged proteins for degradation. When combined with endogenous locus GFP tagging by CRISPR-Cas9 or rescue of a null mutant with a GFP fusion, this approach enables routine and efficient tissue-specific protein ablation. We show that this approach works in multiple tissues—the epidermis, intestine, body wall muscle, sensory neurons, and touch neurons—where it recapitulates expected loss-of-function mutant phenotypes. The transgene toolkit and the strain set described here will complement existing approaches to enable routine analysis of the tissue-specific roles of *C. elegans* proteins.

## INTRODUCTION

Techniques for disrupting protein function in specific tissues or at particular points in development are enabling detailed analysis of developmental mechanisms. To analyze gene function in specific tissues, Cre-LoxP based knockout methods have been established in many model organisms, including *C. elegans* (Ruijtenberg and Van Den Heuvel, 2015). Tissue-specific CRISPR-Cas9 based gene knockouts and RNAi have also been described in *C. elegans* (Qadota et al., 2007; Shen et al., 2014). However, the utility of DNA/RNA editing approaches can be limited by perdurance of the target protein following excision, which can delay the manifestation of phenotypes.

An alternative approach that circumvents this problem is to directly target proteins for degradation in specific tissues. One method for achieving this is based on transplanting the auxin-induced protein degradation system from plants (Holland et al., 2012; Nishimura et al., 2009). In this system, addition of the small molecule auxin activates a plant-specific F-box protein, TIR1, that serves as a substrate recognition component of an Skp1–Cullin–F-box (SCF) E3 ubiquitin ligase. Active TIR1 targets proteins containing a specific degron sequence. The auxin-inducible degron (AID) system was recently adapted for *C. elegans* (Zhang et al., 2015). However, it would be useful to have a robust genetically-encoded method that does not require a small molecule, as the exposure kinetics and dosage of small molecules in *C. elegans* is limited by barriers such as the cuticle and the eggshell. To this end, a method was developed that takes advantage of an endogenous *C. elegans* protein degradation system. In this approach, target proteins are tagged with a short degron sequence (ZF1), and the SOCS-box adaptor protein ZIF-1, which targets ZF1-containing proteins for proteasomal degradation, is expressed in the target tissue (Armenti et al., 2014). However, a limitation of this system is that ZIF-1 plays an essential role during early embryogenesis (DeRenzo et al., 2003; Reese et al., 2000). Thus, proteins tagged with

the ZF1 degron are degraded during embryogenesis as well as in the target tissue, which is problematic for analysis of proteins that function during embryogenesis as well as at later developmental stages.

Here, we develop a new system that combines potent ZIF-1-mediated protein degradation (Armenti et al., 2014) with the previously described deGradFP approach (Caussin et al., 2012). In deGradFP, a GFP nanobody is fused to a F-box protein to degrade GFP-tagged proteins. Since the originally described F-box adaptor does not work in *C. elegans* (our unpublished observations), we fused the GFP nanobody to ZIF-1. We show that expression of this fusion enables efficient depletion of GFP-tagged proteins in multiple tissues. In conjunction with GFP-tagging at endogenous loci using CRISPR-Cas9 (Paix et al., 2016) or rescue of null mutants with GFP fusions expressed from transgenes, this approach enables routine protein depletion controlled by the spatial and temporal expression pattern of the promoter driving the GFP-degrading module. We describe a toolkit of transgenes expressing GFP degradation adaptors in different tissues that should facilitate tissue-specific analysis of protein function in *C. elegans*.

## RESULTS

### Epidermal expression of a GFP nanobody::ZIF-1 fusion depletes GFP-tagged proteins that localize to different subcellular locations

To selectively degrade GFP-tagged proteins, we expressed a GFP nanobody::ZIF-1 fusion under tissue-specific promoters (**Fig. 1A**). This fusion protein acts as a GFP-to-ligase adapter that promotes ubiquitination of the GFP-tagged protein by the Cul2 family E3 ligase CUL-2 and subsequent degradation by the proteasome (DeRenzo et al., 2003). We previously showed that epidermis-specific expression of a GFP nanobody::ZIF-1 fusion (*epiDEG*; **Fig. 1A**) led to efficient degradation of an endogenously tagged GFP fusion with the  $\gamma$ -tubulin complex component GIP-2 (Wang et al., 2015). To test whether *epiDEG* can target proteins that localize to different subcellular locations, we crossed the *epiDEG* transgene into strains expressing GFP tagged proteins that localize to: the cytoplasm (transgene encoded GFP:: $\beta$ -tubulin; **Fig. 1B**), apical cell junctions (transgene encoded DLG-1::GFP; **Fig. 1C**), and the nucleus and nuclear envelope (endogenously tagged GFP::MAD-1 (also called MDF-1 in the *C. elegans* literature); **Fig. 1D**). Quantification (**Fig. S1A-C**) revealed a reduction in GFP fluorescence intensity in the larval epidermis for all three markers (DLG-1::GFP, 96%; GFP::MAD-1, 81%; GFP:: $\beta$ -tubulin, 58%; **Fig. 1B-D**), whereas signal intensity was unchanged in control tissues (**Fig. 1C-D**; DLG-1::GFP & GFP::MAD-1, GFP:: $\beta$ -tubulin was expressed in the epidermis only). We conclude that the GFP nanobody::ZIF-1 fusion can degrade proteins that localize to different subcellular locations; we note that it remains unclear whether depletion of proteins from the nucleus and cellular junctions occurs by targeting and degradation at these locations or by degrading the protein from the cytoplasm. With the exception of GFP:: $\beta$ -tubulin, which we expect is heavily

expressed, reduction by *epiDEG* was consistently greater than 80% (**Fig. 1C-D**; Wang et al., 2015).

### **GFP-mediated protein degradation is efficient in multiple *C. elegans* tissues**

To determine whether the GFP nanobody::ZIF-1 fusion could degrade GFP-tagged proteins in different tissues, we expressed the GFP nanobody::ZIF-1 fusion or ZIF-1 alone (as a control) using promoters that drive expression in the intestine (*intDEG*, *Pelt-2*; Fukushige et al., 1998), body wall muscle (*bwmDEG*, *Pmyo-3*; Fire and Waterston, 1989) and sensory neurons (*senNeuDEG*, *Posm-6*; Collet et al., 1998). The transgenes also included an operon linker (Huang et al., 2001) followed by an mCherry::Histone H2b reporter to allow identification of cells expressing the degradation module (*DEG*) or control transgenes (**Fig. 2A**). To assess the relative function of the degradation module in different tissues, the transgenes were introduced into a background expressing endogenously tagged GFP::MAD-1, which is widely expressed and localizes to nuclei in differentiated tissues throughout development (**Fig. S2**). In all three tested tissues, GFP::MAD-1 signal was eliminated when the GFP nanobody::ZIF-1 fusion, but not ZIF-1 alone, was expressed (**Fig. 2B-D**). Testing *intDEG* with a second endogenously tagged transgene GFP::PP1<sup>GSP-2</sup> also revealed specific reduction of the intestinal signal to background levels (**Fig. S3**). We conclude that the GFP nanobody::ZIF-1 fusion targets GFP-tagged proteins for degradation in multiple tissues (promoters and targets are summarized in **Table S1**).

### **Degradation of GIP-2::GFP in the intestine causes cell division defects and impairs *C. elegans* growth**

To determine whether GFP-mediated degradation recapitulated loss-of-function phenotypes, we analyzed embryonic and larval phenotypes in control and *intDEG* worms

crossed with endogenously tagged GIP-2::GFP, an essential component of the microtubule-nucleating  $\gamma$ -tubulin complex. During *C. elegans* intestinal differentiation in the embryo, the  $\gamma$ -tubulin complex re-localizes from centrosomes to the apical cell surface (Feldman and Priess, 2012; **Fig. 3A**). Co-expressing *intDEG*, but not the control transgene, eliminated the intestinal GIP-2::GFP signal (**Fig. 3A**).

The *C. elegans* intestine arises from the E blastomere of the 8-cell embryo (Deppe et al., 1978). The *elt-2* promoter that drives *intDEG* expression turns on at the 2E stage (2-cell intestine) and becomes dominant from the 8E/16E stage (8- to 16-cell intestine) (McGhee et al., 2007). Since the  $\gamma$ -tubulin complex is required for cell division (Hannak et al., 2002; Strome et al., 2001), its inhibition should reduce intestinal cell number. Indeed, in 1.5 to 1.8-fold stage embryos, when control embryos typically have 20 intestinal cells, only 8-10 intestinal nuclei were detected in *intDEG* embryos with endogenously tagged GIP-2::GFP (**Fig. 3A**); larval *intDEG* worms also grew more slowly and reached a smaller adult size than controls (**Fig. 3B**). Thus, intestinal GIP-2::GFP degradation resulted in a tissue-specific cell division defect consistent with loss of the  $\gamma$ -tubulin complex, validating our approach.

### **Degradation of GFP::DLK-1 in the touch neurons blocks axon regeneration**

To determine whether GFP-mediated protein degradation occurs in the nervous system, we expressed the GFP nanobody::ZIF-1 fusion from a transgene that also included cytoplasmic mKate2 (to visualize axons) using the *mec-18* promoter (*tchNeuDEG*; **Fig. 4A**). To assess efficacy we targeted a GFP fusion with DLK-1 (Dual-Leucine zipper Kinase MAPKKK) (K. Noma and Y. Jin, unpublished), which is required to initiate axon regeneration (Hammarlund et al., 2009; Yan et al., 2009). Following laser-induced axotomy in the PLM touch neuron (**Fig. 4B**), GFP::DLK-1 promoted axon regrowth in the presence of endogenous DLK-1, consistent with the known effects of

DLK-1 overexpression (Hammarlund et al., 2009; Yan et al., 2009), while a *dlk-1* deletion mutant strongly impaired regrowth (**Fig. 4C,D**). GFP::DLK-1 expression fully rescued the impaired regrowth of the *dlk-1* $\Delta$  mutant, and this rescue was abolished by introduction of *tchNeuDEG* (**Fig. 4C-E**). We note that no defects in axon regrowth were detected in *tchNeuDEG* worms with endogenously tagged GIP-2::GFP or DHC-1::GFP (**Fig. S4**), suggesting that GIP-2 and DHC-1 are not required for axon regrowth in PLM touch neurons.



## DISCUSSION

We describe a robust method for the degradation of GFP fusions that we anticipate will complement existing approaches—genetic locus removal, RNA interference and auxin-mediated degradation—to enable tissue-specific analysis of protein function in *C. elegans*. The utility of this approach is enhanced by the recent development of CRISPR/Cas9-based methods that enable routine GFP tagging of endogenous loci (Dickinson et al., 2013; Paix et al., 2016). We expect that the set of strains we describe here will be a useful resource and will serve as a template for engineering of additional versions that will expand the utility of this strategy.

The strength of the promoter driving the degron cassette, the efficiency of CUL-2-dependent proteasomal degradation in the target tissue, and the expression level of the target will influence the kinetics and penetrance of degradation. At present, we do not know the precise kinetics of in vivo degradation. When the ZF1 degron and ZIF-1 pair was used, target degradation occurred with a half-life of 20-30 minutes (Armenti et al., 2014). We expect the GFP nanobody::ZIF-1 fusion to have comparable performance, but degradation kinetics will need to be measured for each degron/target pair when this information is important for interpreting the phenotype. Whether including sequences targeting the GFP nanobody::ZIF-1 fusion to specific compartments (e.g. the nucleus) would improve degradation efficiency in that compartment also remains to be tested.

The GFP nanobody we use here (vhhGFP4; Rothbauer et al., 2006) recognizes common GFP variants such as EGFP, Venus, YFP, EYFP (Causinus et al., 2012) and superfolderGFP (S.W., unpublished observation) but does not recognize coral-derived red fluorescent proteins. We have preliminary data that the nanobody also does not recognize mNeonGreen (D.K.C., unpublished observation), a lancelet-derived green fluorescent protein distantly related to Aequorea GFP (Shaner et al., 2013) that exhibits robust fluorescence in *C. elegans* (Dickinson et al., 2015). Thus, red fluorescent proteins

are a good choice for marker fusions for phenotypic analysis in the presence of the degnon; mNeonGreen could also be used in cases where it is not necessary to use the green channel to monitor degradation of the tagged GFP fusion.

## MATERIALS AND METHODS

### *C. elegans* Strains

*C. elegans* strains are listed in the Supplemental Materials and Methods. All strains were maintained at 20°C. Transgenic strains were engineered as described (Dickinson et al., 2013; Frøkjær-Jensen et al., 2008). Briefly, GFP was fused to the N-terminus of MAD-1 and PP1<sup>GSP-2</sup>, and the C-terminus of GIP-2 and DHC-1 at their endogenous loci using CRISPR-Cas9 (Dickinson et al., 2013). Transgenes of C-terminally tagged DLG-1::GFP, N-terminally tagged GFP:: $\beta$ -tubulin<sup>TBB-2</sup> and GFP::DLK-1 were generated using Mos1 transposon mediated single copy insertion (Frøkjær-Jensen et al., 2008). Constructs and strains will be made available through Addgene and the Caenorhabditis Genetics Center (CGC), respectively.

### Laser Axotomy and Light Microscopy

Laser axotomy was performed as described (Chen et al., 2011). Images in **Figs. 1B** and **S1A** were acquired using an inverted Zeiss Axio Observer Z1 system equipped with AxioVision software, a Yokogawa spinning-disk confocal head (CSU-X1), a 63 $\times$  1.40 NA Plan APOCHROMAT lens (Zeiss, Oberkochen, Germany), and a Hamamatsu ORCA-ER camera (Model C4742-95-12ERG, Hamamatsu photonics, Shizuoka, Japan). Images in **Figs. 1C**, **1D**, **3A** and **S1B** were acquired on the same system using an EMCCD camera (QuantEM:512SC, Photometrics, Tucson, AZ). Images in **Figs. 2**, **S1C-D**, **S2** and **S3** were acquired using a Nikon TE2000-E inverted microscope equipped with Andor iQ2 software, a Yokogawa spinning-disk confocal head (CSU-10), a 60 $\times$  1.40 NA Plan APOCHROMAT lens (Nikon, Tokyo, Japan) and an EMCCD camera (iXon DV887ECS-BV, Andor Technology, Belfast, United Kingdom). Images in **Figs. 4D,E** and **S4** were acquired using Zeiss LSM510 (**Fig. 4D**) and LSM710 (**Figs. 4E** and **S4**; Zeiss

Plan Achromat 63× 1.4 NA oil DIC objective) confocal microscopes controlled by ZEN software (Zeiss). Images in **Fig. 3B** were acquired using the DinoEye eyepiece camera (AM7023B, Dino-Lite, Hsinchu, Taiwan) mounted on a Nikon SMZ800 dissection scope using the DinoXcope software (Dino-Lite).

### **Image Analysis**

Image analysis was first performed in Fiji (ImageJ) in a semi-automated manner aided by customized macros. Either a box or a line was made inside or across the region of interest to measure raw GFP intensities. Raw measurements were analyzed using customized Python scripts to compute final values. For details, see Supplemental Figures and Materials and Methods.

### **ACKNOWLEDGEMENTS**

The GFP nanobody vhhGFP4 was cloned from pcDNA3\_NSImb-vhhGFP4, a gift from Markus Affolter (Addgene plasmid # 35579). We thank Kentaro Noma and Yishi Jin for sharing the GFP::DLK-1 transgene prior to publication. We thank the Caenorhabditis Genetics Center for strains and members of the Chisholm lab and the Oegema Desai labs for helpful discussions.

### **COMPETING INTERESTS**

The authors declare no competing interests.

### **AUTHOR CONTRIBUTIONS**

S.W., N.H.T, A.D.C., A.D. and K.O. designed the experiments. S.W., N.H.T., P. L-G., B.P. and D.K.C performed the experiments. S.W. and N.H.T. performed data analysis. S.W., A.D. and K.O. wrote the paper with input from all authors.

## **FUNDING**

This work was supported by the National Institutes of Health [GM074207 to K.O., NS093588 to A.D.C.]. A.D. and K.O. receive salary and other support from the Ludwig Institute for Cancer Research.

## REFERENCES

- Armenti, S. T., Lohmer, L. L., Sherwood, D. R. and Nance, J.** (2014). Repurposing an endogenous degradation system for rapid and targeted depletion of *C. elegans* proteins. *Development* **141**, 4640–4647.
- Caussin, E., Kanca, O. and Affolter, M.** (2012). Fluorescent fusion protein knockout mediated by anti-GFP nanobody. *Nat. Struct. Mol. Biol.* **19**, 117–121.
- Chen, L., Wang, Z., Ghosh-Roy, A., Hubert, T., Yan, D., O'Rourke, S., Bowerman, B., Wu, Z., Jin, Y. and Chisholm, A. D.** (2011). Axon Regeneration Pathways Identified by Systematic Genetic Screening in *C. elegans*. *Neuron* **71**, 1043–1057.
- Collet, J., Spike, C. A., Lundquist, E. A., Shaw, J. E. and Herman, R. K.** (1998). Analysis of *osm-6*, a gene that affects sensory cilium structure and sensory neuron function in *Caenorhabditis elegans*. *Genetics* **148**, 187–200.
- Deppe, U., Schierenberg, E., Cole, T., Krieg, C., Schmitt, D., Yoder, B. and von Ehrenstein, G.** (1978). Cell lineages of the embryo of the nematode *Caenorhabditis elegans*. *Proc. Natl. Acad. Sci. U. S. A.* **75**, 376–380.
- DeRenzo, C., Reese, K. J. and Seydoux, G.** (2003). Exclusion of germ plasm proteins from somatic lineages by cullin-dependent degradation. *Nature* **424**, 685–689.
- Dickinson, D. J., Ward, J. D., Reiner, D. J. and Goldstein, B.** (2013). Engineering the *Caenorhabditis elegans* genome using Cas9-triggered homologous recombination. *Nat. Methods* **10**, 1028–1034.
- Dickinson, D. J., Pani, A. M., Heppert, J. K. and Higgins, C. D.** (2015). Streamlined genome engineering with a self-excising drug selection cassette. *Genetics* 1–33.
- Feldman, J. L. and Priess, J. R.** (2012). A role for the centrosome and PAR-3 in the hand-off of MTOC function during epithelial polarization. *Curr. Biol.* **22**, 575–582.
- Fire, A. and Waterston, R. H.** (1989). Proper expression of myosin genes in transgenic

nematodes. *EMBO J.* **8**, 3419–3428.

- Frøkjær-Jensen, C., Davis, M. W., Hopkins, C. E., Newman, B. J., Thummel, J. M., Olesen, S.-P., Grunnet, M. and Jorgensen, E. M.** (2008). Single-copy insertion of transgenes in *Caenorhabditis elegans*. *Nat. Genet.* **40**, 1375–1383.
- Fukushige, T., Hawkins, M. G. and McGhee, J. D.** (1998). The GATA-factor *elt-2* is essential for formation of the *Caenorhabditis elegans* intestine. *Dev. Biol.* **198**, 286–302.
- Hammarlund, M., Nix, P., Hauth, L., Jorgensen, E. M. and Bastiani, M.** (2009). Axon regeneration requires a conserved MAP kinase pathway. *Science* **323**, 802–806.
- Hannak, E., Oegema, K., Kirkham, M., Gönczy, P., Habermann, B. and Hyman, A. A.** (2002). The kinetically dominant assembly pathway for centrosomal asters in *Caenorhabditis elegans* is gamma-tubulin dependent. *J. Cell Biol.* **157**, 591–602.
- Holland, A. J., Fachinetti, D., Han, J. S. and Cleveland, D. W.** (2012). Inducible, reversible system for the rapid and complete degradation of proteins in mammalian cells. *Proc. Natl. Acad. Sci. U. S. A.* **109**, E3350–E3357.
- Huang, T., Kuersten, S., Deshpande, A. M., Spieth, J., MacMorris, M. and Blumenthal, T.** (2001). Intercistronic region required for polycistronic pre-mRNA processing in *Caenorhabditis elegans*. *Mol. Cell. Biol.* **21**, 1111–1120.
- McGhee, J. D., Sleumer, M. C., Bilenky, M., Wong, K., McKay, S. J., Goszczynski, B., Tian, H., Krich, N. D., Khattra, J., Holt, R. a, et al.** (2007). The *ELT-2* GATA-factor and the global regulation of transcription in the *C. elegans* intestine. *Dev. Biol.* **302**, 627–645.
- Nishimura, K., Fukagawa, T., Takisawa, H., Kakimoto, T. and Kanemaki, M.** (2009). An auxin-based degron system for the rapid depletion of proteins in nonplant cells. *Nat. Methods* **6**, 917–922.
- Paix, A., Schmidt, H. and Seydoux, G.** (2016). Cas9-assisted recombineering in *C.*

*elegans*: genome editing using in vivo assembly of linear DNAs. *Nucleic Acids Res.* **44**, e128.

**Qadota, H., Inoue, M., Hikita, T., Köppen, M., Hardin, J. D., Amano, M., Moerman, D. G. and Kaibuchi, K.** (2007). Establishment of a tissue-specific RNAi system in *C. elegans*. *Gene* **400**, 166–173.

**Reese, K. J., Dunn, M. a, Waddle, J. a and Seydoux, G.** (2000). Asymmetric segregation of PIE-1 in *C. elegans* is mediated by two complementary mechanisms that act through separate PIE-1 protein domains. *Mol. Cell* **6**, 445–455.

**Rothbauer, U., Zolghadr, K., Tillib, S., Nowak, D., Schermelleh, L., Gahl, A., Backmann, N., Conrath, K., Muyldermans, S., Cardoso, M. C., et al.** (2006). Targeting and tracing antigens in live cells with fluorescent nanobodies. *Nat. Methods* **3**, 887–889.

**Ruijtenberg, S. and Van Den Heuvel, S.** (2015). G1/S Inhibitors and the SWI/SNF Complex Control Cell-Cycle Exit during Muscle Differentiation. *Cell* **162**, 300–313.

**Shaner, N. C., Lambert, G. G., Chammas, A., Ni, Y., Cranfill, P. J., Baird, M. A., Sell, B. R., Allen, J. R., Day, R. N., Israelsson, M., et al.** (2013). A bright monomeric green fluorescent protein derived from *Branchiostoma lanceolatum*. *Nat. Methods* **10**, 407–409.

**Shen, Z., Zhang, X., Chai, Y., Zhu, Z., Yi, P., Feng, G., Li, W. and Ou, G.** (2014). Conditional Knockouts Generated by Engineered CRISPR-Cas9 Endonuclease Reveal the Roles of Coronin in *C. elegans* Neural Development. *Dev. Cell* **30**, 625–636.

**Strome, S., Powers, J., Dunn, M., Reese, K., Malone, C. J., White, J., Seydoux, G. and Saxton, W.** (2001). Spindle dynamics and the role of gamma-tubulin in early *Caenorhabditis elegans* embryos. *Mol. Biol. Cell* **12**, 1751–1764.

**Wang, S., Wu, D., Quintin, S., Green, R. A., Cheerambathur, D. K., Ochoa, S. D.,**



**Desai, A. and Oegema, K.** (2015). NOCA-1 functions with  $\gamma$ -tubulin and in parallel to Patronin to assemble non-centrosomal microtubule arrays in *C. elegans*. *Elife* **4**, e08649.

**Yan, D., Wu, Z., Chisholm, A. D. and Jin, Y.** (2009). The DLK-1 Kinase Promotes mRNA Stability and Local Translation in *C. elegans* Synapses and Axon Regeneration. *Cell* **138**, 1005–1018.

**Zhang, L., Ward, J. D., Cheng, Z. and Dernburg, A. F.** (2015). The auxin-inducible degradation (AID) system enables versatile conditional protein depletion in *C. elegans*. *Development* **142**, 4374–4384.

## FIGURES AND FIGURE LEGENDS

### Wang et al. Figure 1

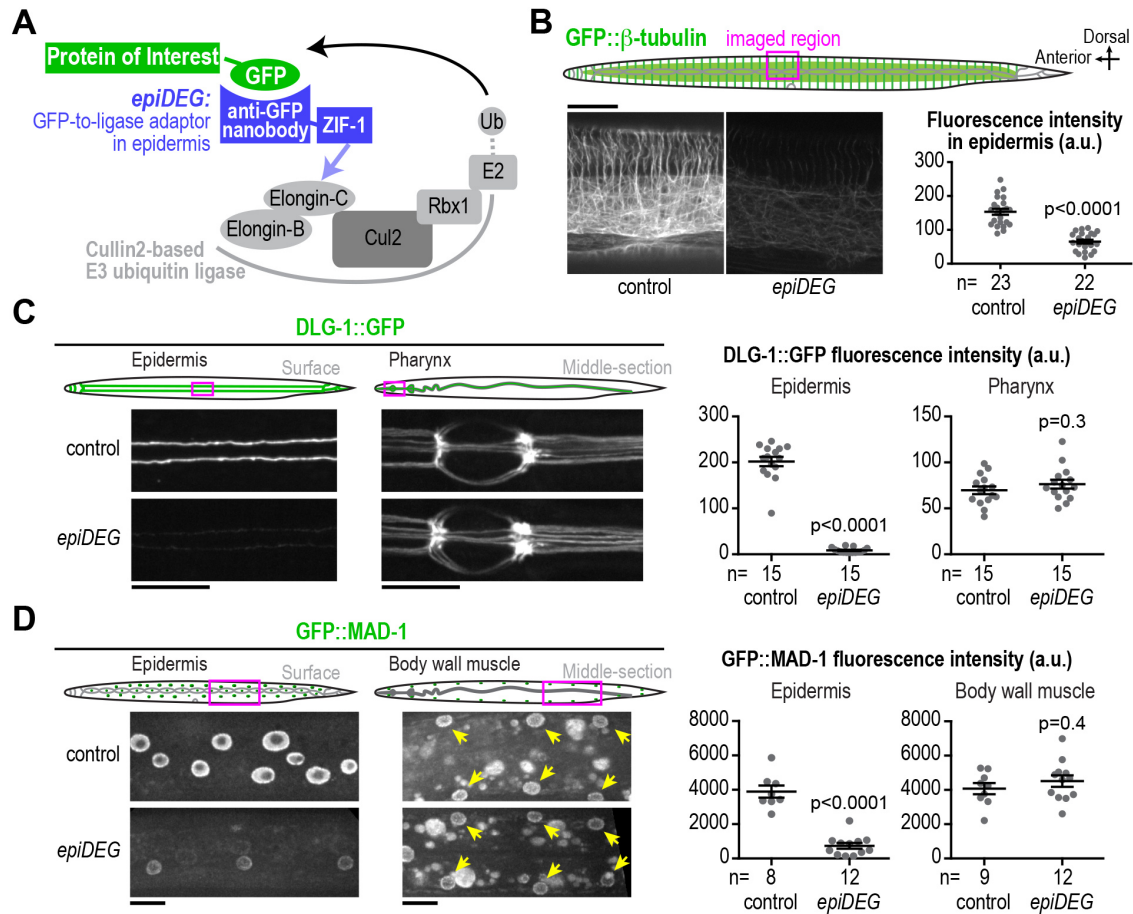

**Figure 1. *epiDEG* efficiently degrades GFP-tagged proteins that localize to different subcellular localizations.** (A) Schematic illustrating the method. (B) Top: schematic showing imaged region. Bottom: fluorescence confocal images of L3 stage worms expressing GFP:: $\beta$ -tubulin and plots of GFP:: $\beta$ -tubulin fluorescence intensity. (C) Left: schematics and fluorescence confocal images of late L4 stage worms expressing DLG-1::GFP. Right: plots of DLG-1::GFP fluorescence intensity. (D) Left: schematics and fluorescence confocal images of L3 stage worms expressing GFP::MAD-1. Right: plots of GFP::MAD-1 fluorescence intensity. n is the number of worms analyzed. Statistics, Student's t-test. p-values are the probability of obtaining the observed results assuming the test group is the same as control. Error bars are SEM. Scale bars, 10  $\mu$ m.

Wang et al. Figure 2

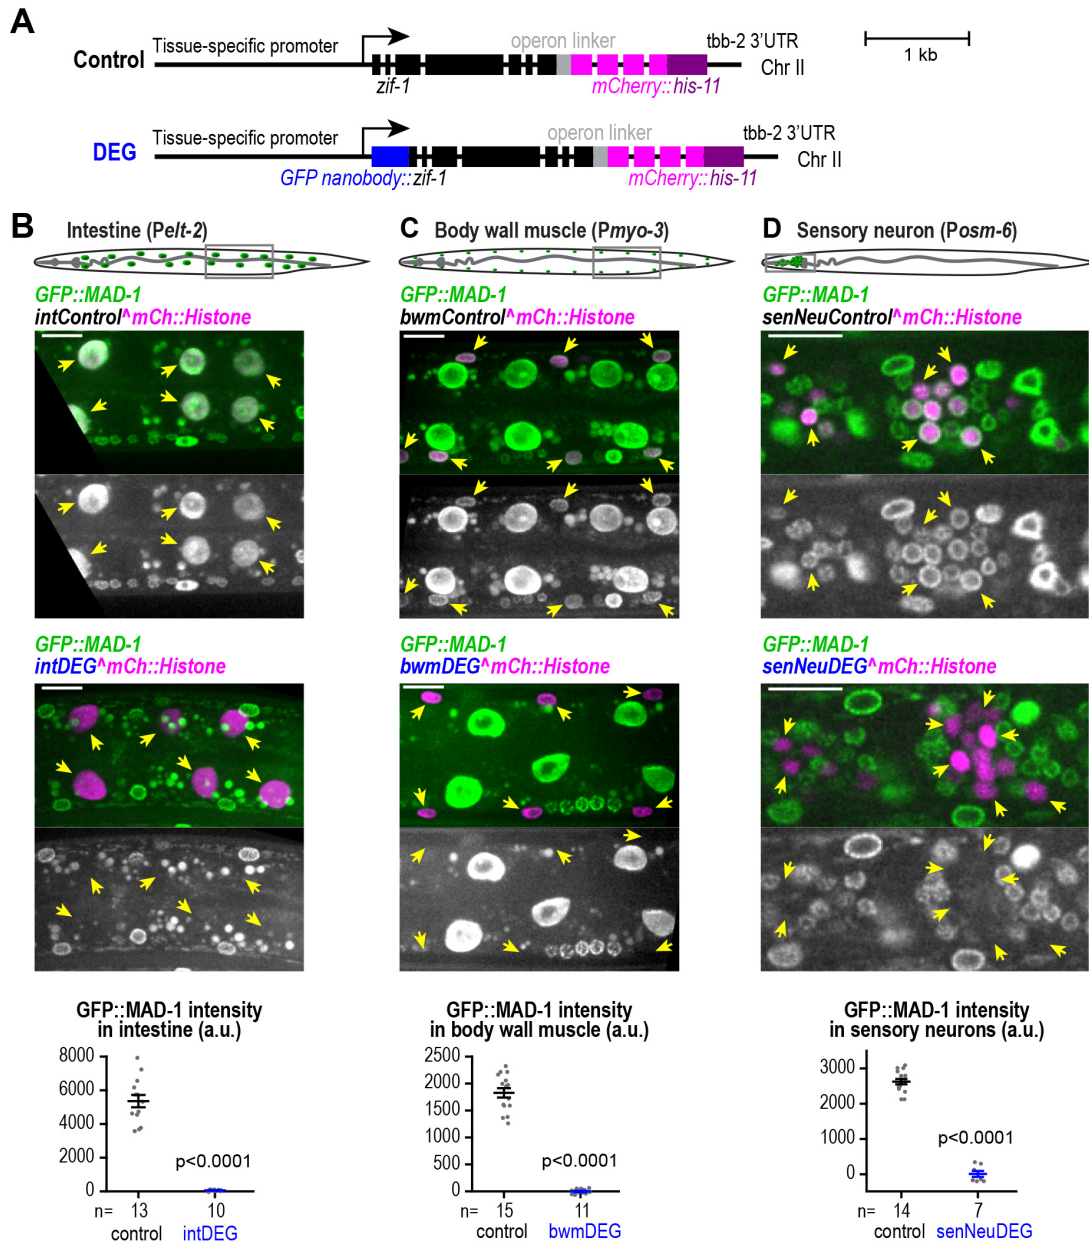

**Figure 2. GFP-mediated protein degradation is efficient in multiple *C. elegans* tissues.** (A) Transgene schematics. (B-D) Top: schematics showing imaged region. Middle: fluorescence confocal images (maximum intensity projections in B and C, single z-slice in D) of L3 stage worms expressing GFP::MAD-1. Bottom: plots of GFP::MAD-1 fluorescence intensity. n is the number of worms analyzed. Statistics, Student's t-test. p-values are the probability of obtaining the observed results assuming the test group is the same as control. Error bars are SEM. Scale bars, 10  $\mu$ m.

## Wang et al. Figure 3

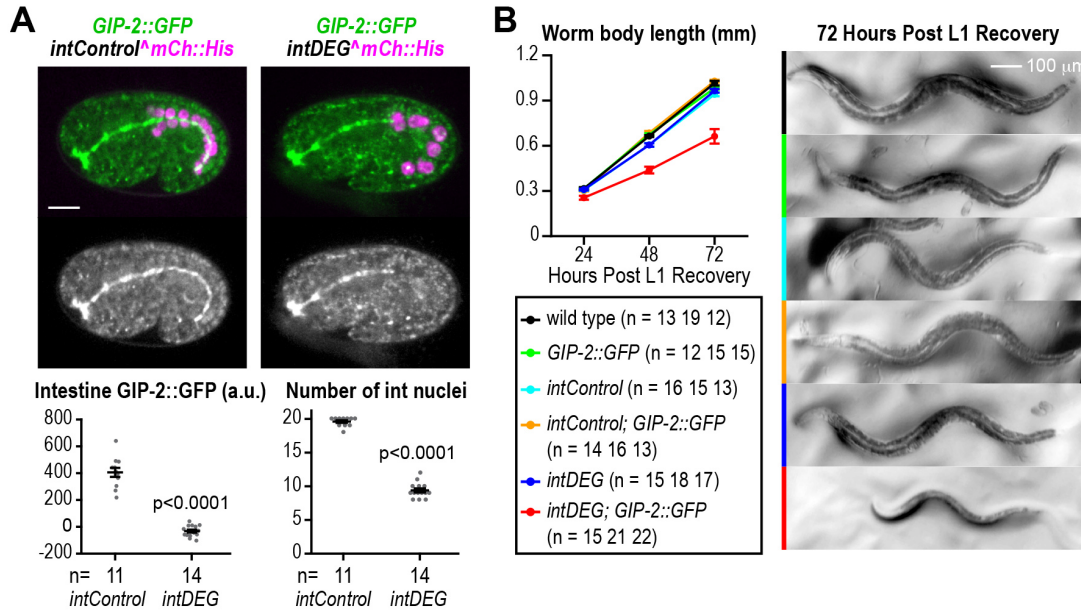

**Figure 3. Degradation of GIP-2::GFP in the intestine causes cell division defects and impairs growth.** (A) Top: maximum intensity projections of confocal images of 1.5-fold *C. elegans* embryos. Bottom: plots of GIP-2::GFP fluorescence intensity (*left*) and number of intestinal nuclei (*right*) in 1.5-1.8-fold embryos. n is the number of embryos analyzed. (B) Left: plot of body length after recovery from L1 synchronization. Right: representative images of worms 72 hours post recovery. n is the number of worms analyzed at 24, 48 and 72 hours. Statistics, Student's t-test. p-values are the probability of obtaining the observed results assuming the test group is the same as control. Error bars are SEM. Scale bars, 10  $\mu$ m or as indicated.

## Wang et al. Figure 4

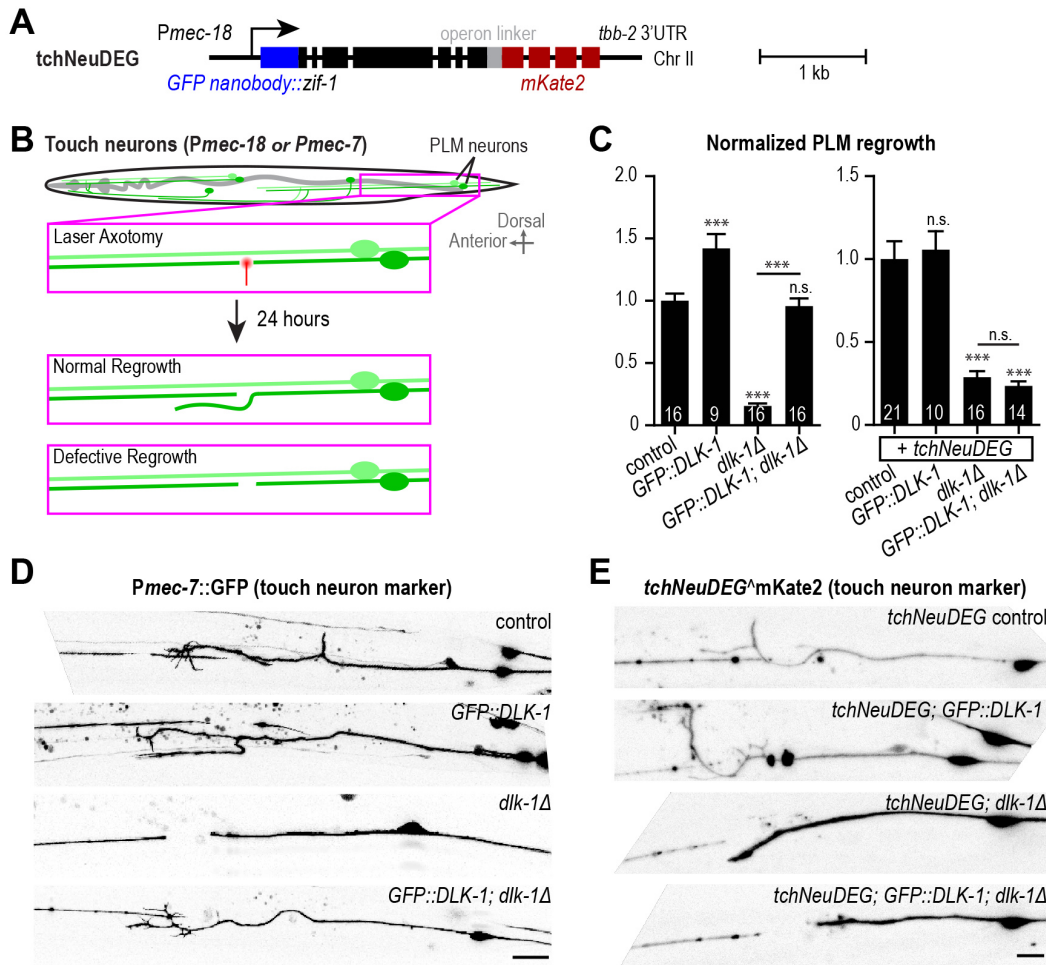

**Figure 4. Degradation of GFP::DLK-1 in the touch neurons blocks axon regeneration.** (A) Transgene schematic. (B) Schematic of the axon regeneration assay. (C) Plots of normalized touch neuron (PLM) regrowth at 24 hours post laser axotomy. Number in each bar is worms assayed. (D-E) Inverted grayscale images of the touch neuron (PLM) axon. Statistics, One-way ANOVA with Bonferroni's post test. \*\*\*:  $p < 0.001$ . n.s., not significant. Significance compared to control unless specified by the line. Error bars are SEM. Scale bars, 10  $\mu$ m.
